# Supplementary material
Source: publisher site journal article supplement (https://spandidos-publications.com/2741/downloadSupplementary)

FigureS1. Transfection efficacy of miR-138 antagomir. (A) Following transfection for 48h in H9C2 cells, miR-138 expression in the antagomir group was decreased to 5.9% of that in the antagomir-NC group. (B) Following transfection for 2 weeks in C57BL/6 mice, miR-138 expression in the antagomir group decreased to 23.4% of that in the antagomir-NC group. \* $P < 0.05$ . miR-138, microRNA-138; NC, negative control.

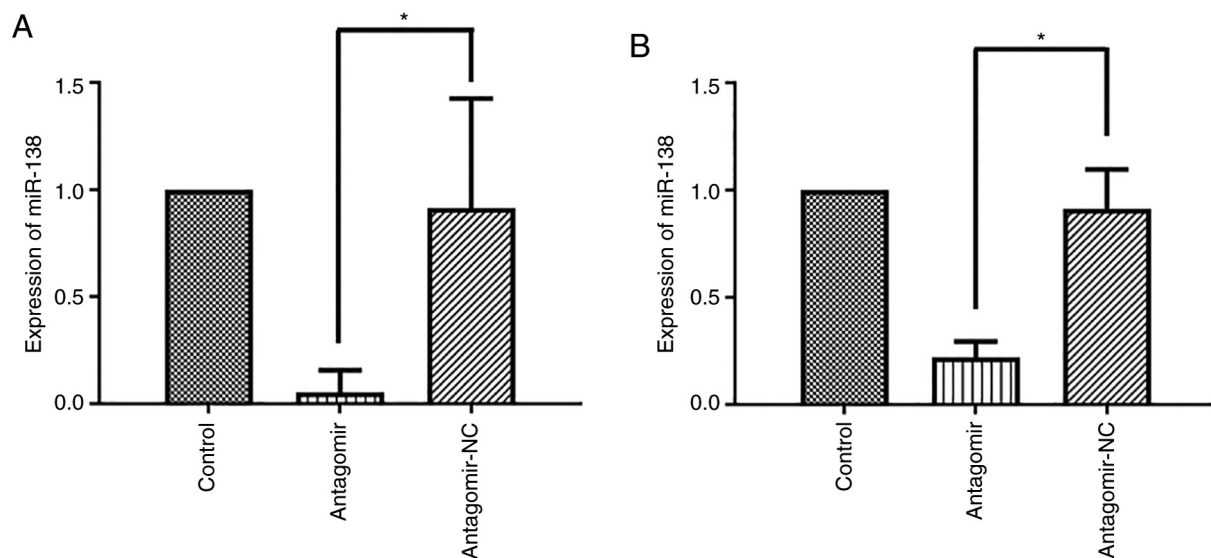

Supplement: Supplementary file 1 [file downloadSupplementary]
